# Supplementary material
Source: publisher site journal article supplement (https://www.dovepress.com/get_supplementary_file.php?f=277351.docx)
Supplement: Supplementary file 1 [file get_supplementary_file.php]

**Supplementary Table 1 The clinicopathological features of OSCC**

| Characteristics | No.  n(%) | *P* |
| --- | --- | --- |
| Total | 45 |  |
| Age(years) |  |  |
| ⩽ 50 | 19 | 0.082 |
| > 50 | 26 |  |
| Sex |  |  |
| Male | 28 |  |
| Female | 17 | 0.0065 |
| TNM stage |  |  |
| I | 10 | 0.0079 |
| II | 8 |  |
| III | 13 |  |
| IV | 14 |  |
| Histological grade |  |  |
| G1 | 11 | 0.0084 |
| G2/G3 | 34 |  |
| History of smoking |  |  |
| ever | 20 | 0.091 |
| Never | 25 |  |
| Lymph node metastasis |  |  |
| No | 30 | 0.0075 |
| Yes | 15 |  |

For cell lines, we extracted DNA from various cells (SCC‑9, SCC‑25, HN4, Tca‑811 and hNOK) using the Genome extraction kit of Axygen, amplified by the 21-STR amplification scheme. And then we detected STR spot and sex gene Amelogenin on the ABI 7900HT Fast Real-Time PCR System (Supplementary Table 2-6). The DNA typing of these cells could be found in the cell line search, The Cell Bank of the Chinese Academy of Sciences also showed that these cell names were SCC‑9, SCC‑25, HN4, Tca‑811 and hNOK, respectively. No multiple alleles were found in these cell lines in this test.

**Supplementary Table 2 Genotyping results of STR and Amelogenin locus in SCC 9 cells**

| SCC‑9 | | |
| --- | --- | --- |
| Marker | Allele 1 | Allele 2 |
| Amelogenin | X | Y |
| CSF1PO | 11 | 11 |
| D3S1358 | 15 | 15 |
| D5S818 | 12 | 12 |
| D7S820 | 8 | 8 |
| D8S1179 | 13 | 13 |
| D13S317 | 9 | 9 |
| D16S539 | 10 | 11 |
| D18S51 | 12 | 14 |
| D21S11 | 28 | 28 |
| FGA | 20 | 25 |
| Penta D | 9 | 9 |
| Penta E | 11 | 11 |
| TH01 | 8 | 9 |
| TPOX | 9 | 11 |
| vWA | 17 | 17 |

**Supplementary Table 3 Genotyping results of STR and Amelogenin locus in SCC-25 cells**

| SCC-25 | | |
| --- | --- | --- |
| Marker | Allele 1 | Allele 2 |
| Amelogenin | X | X |
| CSF1PO | 10 | 10 |
| D3S1358 | 17 | 17 |
| D5S818 | 12 | 12 |
| D7S820 | 12 | 12 |
| D8S1179 | 13 | 13 |
| D13S317 | 13 | 13 |
| D16S539 | 11 | 12 |
| D18S51 | 16 | 16 |
| D21S11 | 30 | 30 |
| FGA | 20 | 24 |
| Penta D | 13 | 13 |
| Penta E | 14 | 15 |
| TH01 | 8 | 8 |
| TPOX | 8 | 12 |
| vWA | 16 | 19 |

**Supplementary Table 4 Genotyping results of STR and Amelogenin locus in HN4 cells**

| HN4 | | |
| --- | --- | --- |
| Marker | Allele 1 | Allele 2 |
| Amelogenin | X | X |
| CSF1PO | 10 | 10 |
| D3S1358 | 16 | 17 |
| D5S818 | 12 | 12 |
| D7S820 | 11 | 12 |
| D8S1179 | 15 | 17 |
| D13S317 | 8 | 12 |
| D16S539 | 10 | 11 |
| D18S51 | 14 | 15 |
| D21S11 | 28 | 30 |
| FGA | 26 | 24 |
| Penta D | 10 | 9 |
| Penta E | 15 | 15 |
| TH01 | 10 | 11.2 |
| TPOX | 9 | 10 |
| vWA | 15 | 17 |

**Supplementary Table 5 Genotyping results of STR and Amelogenin locus in Tca‑811 cells**

| Tca‑811 | | |
| --- | --- | --- |
| Marker | Allele 1 | Allele 2 |
| Amelogenin | X | X |
| CSF1PO | 12 | 10 |
| D3S1358 | 15 | 15 |
| D5S818 | 12 | 11 |
| D7S820 | 14 | 12 |
| D8S1179 | 15 | 13 |
| D13S317 | 9 | 11 |
| D16S539 | 13 | 12 |
| D18S51 | 16 | 14 |
| D21S11 | 29 | 32 |
| FGA | 24 | 24 |
| Penta D | 13 | 12 |
| Penta E | 14 | 10 |
| TH01 | 8 | 8.5 |
| TPOX | 10 | 12 |
| vWA | 17 | 19 |

**Supplementary Table 6 Genotyping results of STR and Amelogenin locus in hNOK cells**

| hNOK | | |
| --- | --- | --- |
| Marker | Allele 1 | Allele 2 |
| Amelogenin | X | X |
| CSF1PO | 10 | 13 |
| D3S1358 | 15 | 18 |
| D5S818 | 13 | 12 |
| D7S820 | 10 | 10 |
| D8S1179 | 15 | 15 |
| D13S317 | 11 | 13 |
| D16S539 | 12 | 12 |
| D18S51 | 10 | 15 |
| D21S11 | 30 | 34 |
| FGA | 20 | 20 |
| Penta D | 10.2 | 13 |
| Penta E | 11 | 12 |
| TH01 | 11 | 12.5 |
| TPOX | 9 | 12 |
| vWA | 16 | 16 |

**Supplementary Table 7 The potential targets of miR-133a-5p**

miRNA_id target_gene type score

miR-133a-5p TP53 7mer-m8 235.57

miR-133a-5p EGFR 7mer-1a 141.4

miR-133a-5p EGFR 6mer 141.4

miR-133a-5p CCND1 6mer 114.91

miR-133a-5p CDH1 6mer 114.02

miR-133a-5p AKT1 7mer-1a 109.71

miR-133a-5p AKT1 6mer 109.71

miR-133a-5p MET 7mer-1a 108.12

miR-133a-5p MYC 6mer 101.56

miR-133a-5p KRAS 7mer-1a 99.33

miR-133a-5p KRAS 6mer 99.33

miR-133a-5p TP63 7mer-1a 92.75

miR-133a-5p TP63 6mer 92.75

miR-133a-5p TERT 7mer-1a 88.19

miR-133a-5p TGFB1 6mer 85.12

miR-133a-5p EGF 7mer-m8 81.11

miR-133a-5p BCL2 7mer-1a 79.36

miR-133a-5p SMAD4 8mer-1a 79.02

miR-133a-5p SMAD4 7mer-1a 79.02

miR-133a-5p SMAD4 6mer 79.02

miR-133a-5p IL10 6mer 77.08

miR-133a-5p FGFR2 7mer-m8 76.75

miR-133a-5p FGFR2 6mer 76.75

miR-133a-5p BRCA2 6mer 75.21

miR-133a-5p STAT1 7mer-1a 74.18

miR-133a-5p STAT1 6mer 74.18

miR-133a-5p STK11 6mer 73.99

miR-133a-5p ATM 6mer 72.85

miR-133a-5p KDR 7mer-1a 72.64

miR-133a-5p KDR 6mer 72.64

miR-133a-5p FHIT 7mer-1a 72.35

miR-133a-5p FHIT 6mer 72.35

miR-133a-5p CDK4 6mer 71.81

miR-133a-5p RET 7mer-1a 70.23

miR-133a-5p RET 6mer 70.23

miR-133a-5p PTCH1 7mer-1a 69.88

miR-133a-5p PTCH1 6mer 69.88

miR-133a-5p MDM2 7mer-m8 69.31

miR-133a-5p MDM2 7mer-1a 69.31

miR-133a-5p NFE2L2 7mer-1a 68.47

miR-133a-5p TGFA 7mer-1a 68.29

miR-133a-5p TGFA 6mer 68.29

miR-133a-5p SRC 7mer-1a 68.08

miR-133a-5p BRCA1 6mer 68.01

miR-133a-5p MSH2 7mer-m8 67.61

miR-133a-5p MSH2 7mer-1a 67.61

miR-133a-5p MSH2 6mer 67.61

miR-133a-5p ESR1 7mer-m8 67.42

miR-133a-5p FGFR1 6mer 65.8

miR-133a-5p CDKN2B 8mer-1a 65.12

miR-133a-5p CDKN2B 6mer 65.12

miR-133a-5p TNFRSF10B 6mer 62.95

miR-133a-5p CXCL12 7mer-m8 62.89

miR-133a-5p CXCL12 6mer 62.89

miR-133a-5p FLT1 6mer 60.62

miR-133a-5p ERBB3 6mer 60.33

miR-133a-5p PDCD1 7mer-1a 59.9

miR-133a-5p FN1 6mer 59.74

miR-133a-5p INS 6mer 59.66

miR-133a-5p VHL 6mer 58.82

miR-133a-5p OGG1 7mer-1a 57.95

miR-133a-5p OGG1 6mer 57.95

miR-133a-5p NKX2-1 7mer-1a 57.83

miR-133a-5p EP300 6mer 57.33

miR-133a-5p IGF2 7mer-1a 57.27

miR-133a-5p IGF2 6mer 57.27

miR-133a-5p FLT4 6mer 57.21

miR-133a-5p ICAM1 7mer-m8 56.84

miR-133a-5p TP73 6mer 56.55

miR-133a-5p CASP3 8mer-1a 56.22

miR-133a-5p CD44 7mer-1a 55.77

miR-133a-5p CD44 6mer 55.77

miR-133a-5p ERCC2 6mer 55.13

miR-133a-5p PDGFRA 6mer 54.25

miR-133a-5p HLA-DRB16mer 53.88

miR-133a-5p ENG 7mer-1a 53.88

miR-133a-5p PDGFRB 6mer 53.59

miR-133a-5p PIK3R1 7mer-m8 53.53

miR-133a-5p PIK3R1 7mer-1a 53.53

miR-133a-5p ING1 7mer-1a 53.27

miR-133a-5p TLR4 6mer 52.76

miR-133a-5p XIAP 6mer 52.38

miR-133a-5p HIF1A 8mer-1a 52.24

miR-133a-5p FGFR4 8mer-1a 52.14

miR-133a-5p GNAS 7mer-m8 51.91

miR-133a-5p MAPK1 7mer-1a 51.61

miR-133a-5p MAPK1 6mer 51.61

miR-133a-5p LAMC2 8mer-1a 51.53

miR-133a-5p LAMC2 6mer 51.53

miR-133a-5p SMAD3 8mer-1a 51.11

miR-133a-5p PTPN11 7mer-1a 51.06

miR-133a-5p PLAU 7mer-1a 50.61

miR-133a-5p NOTCH1 7mer-1a 50.6

miR-133a-5p RELA 7mer-m8 50.41

miR-133a-5p RELA 6mer 50.41

miR-133a-5p ABL1 6mer 50.34

miR-133a-5p AR 6mer 49.82

miR-133a-5p FOS 6mer 49.63

miR-133a-5p HLA-A 7mer-m8 49.41

miR-133a-5p ERCC1 6mer 49.31

miR-133a-5p FOXP3 6mer 49.12

miR-133a-5p IDH2 6mer 48.5

miR-133a-5p CD274 7mer-1a 48.37

miR-133a-5p CD274 6mer 48.37

miR-133a-5p RAD51 6mer 47.69

miR-133a-5p WWOX 7mer-1a 47.6

miR-133a-5p MSH6 6mer 47.2

miR-133a-5p MAP2K2 8mer-1a 47.04

miR-133a-5p MAP2K2 6mer 47.04

miR-133a-5p RARA 7mer-1a 46.66

miR-133a-5p RARA 6mer 46.66

miR-133a-5p BIRC5 8mer-1a 46.21

miR-133a-5p BIRC5 7mer-1a 46.21

miR-133a-5p BIRC5 6mer 46.21

miR-133a-5p CYP1A1 7mer-1a 44.65

miR-133a-5p HNF1B 7mer-m8 44.36

miR-133a-5p IKBKB 6mer 44.35

miR-133a-5p ESR2 6mer 44.08

miR-133a-5p AKT2 8mer-1a 42.53

miR-133a-5p AKT2 6mer 42.53

miR-133a-5p GSTM1 6mer 42.47

miR-133a-5p ERBB4 7mer-1a 41.69

miR-133a-5p MKI67 6mer 41.64

miR-133a-5p IL2RA 8mer-1a 41.53

miR-133a-5p IL2RA 6mer 41.53

miR-133a-5p CDK6 7mer-1a 41.5

miR-133a-5p CDK6 6mer 41.5

miR-133a-5p CCR6 6mer 41.45

miR-133a-5p CDKN3 6mer 41.41

miR-133a-5p HGF 7mer-m8 41.37

miR-133a-5p HGF 7mer-1a 41.37

miR-133a-5p STAT5B 7mer-1a 41.07

miR-133a-5p STAT5B 6mer 41.07

miR-133a-5p AKT3 7mer-1a 41.05

miR-133a-5p AKT3 6mer 41.05

miR-133a-5p CREB1 7mer-1a 41

miR-133a-5p CREB1 6mer 41

miR-133a-5p ADA 6mer 40.73

miR-133a-5p TSC1 8mer-1a 40.67

miR-133a-5p TSC1 7mer-1a 40.67

miR-133a-5p KITLG 6mer 40.12

miR-133a-5p VIM 8mer-1a 39.88

miR-133a-5p EZH2 6mer 39.5

miR-133a-5p LEP 6mer 39.45

miR-133a-5p TG 7mer-1a 39.43

miR-133a-5p TG 6mer 39.43

miR-133a-5p NPM1 6mer 38.85

miR-133a-5p FANCA 6mer 38.74

miR-133a-5p RAC1 6mer 38.73

miR-133a-5p IDH1 7mer-m8 38.62

miR-133a-5p FANCD2 6mer 38.62

miR-133a-5p CD34 6mer 38.41

miR-133a-5p NME1 7mer-m8 38.19

miR-133a-5p NME1 6mer 38.19

miR-133a-5p ZEB2 6mer 38.13

miR-133a-5p TFAP2A 6mer 38.03

miR-133a-5p PAX8 6mer 37.89

miR-133a-5p CCR5 7mer-m8 37.86

miR-133a-5p BAP1 6mer 37.7

miR-133a-5p PTK2 7mer-1a 37.59

miR-133a-5p GATA3 7mer-m8 37.43

miR-133a-5p PLG 7mer-m8 37.39

miR-133a-5p PDGFB 6mer 37.34

miR-133a-5p MC1R 7mer-1a 37.08

miR-133a-5p HLA-DQB1 7mer-1a 36.73

miR-133a-5p MAPK8 6mer 36.72

miR-133a-5p CREBBP 6mer 36.41

miR-133a-5p CDK1 7mer-1a 36.22

miR-133a-5p CTSD 7mer-m8 36.13

miR-133a-5p CYCS 6mer 35.94

miR-133a-5p TMC8 6mer 35.58

miR-133a-5p DDR2 7mer-1a 35.56

miR-133a-5p IL7R 7mer-m8 35.24

miR-133a-5p IL7R 7mer-1a 35.24

miR-133a-5p IL7R 6mer 35.24

miR-133a-5p PDPN 7mer-1a 35.2

miR-133a-5p PDPN 6mer 35.2

miR-133a-5p BDNF 7mer-1a 35.09

miR-133a-5p NF2 6mer 34.95

miR-133a-5p IL1RN 6mer 34.79

miR-133a-5p TMC6 7mer-1a 34.66

miR-133a-5p TMC6 6mer 34.66

miR-133a-5p PGR 7mer-1a 34.33

miR-133a-5p PGR 6mer 34.33

miR-133a-5p TUBB 6mer 34.03

miR-133a-5p SUFU 7mer-1a 33.94

miR-133a-5p SUFU 6mer 33.94

miR-133a-5p IRF1 6mer 33.64

miR-133a-5p SDHB 6mer 33.37

miR-133a-5p ACE 7mer-m8 33.35

miR-133a-5p ACE 6mer 33.35

miR-133a-5p HNF1A 8mer-1a 33.25

miR-133a-5p HNF1A 6mer 33.25

miR-133a-5p ROS1 7mer-m8 33.15

miR-133a-5p ROS1 7mer-1a 33.15

miR-133a-5p ARAF 7mer-1a 33.15

miR-133a-5p ARAF 6mer 33.15

miR-133a-5p FANCF 7mer-1a 33.08

miR-133a-5p FANCF 6mer 33.08

miR-133a-5p ERCC4 8mer-1a 33.08

miR-133a-5p ERCC4 7mer-1a 33.08

miR-133a-5p ERCC4 6mer 33.08

miR-133a-5p PIK3CG 7mer-1a 33.02

miR-133a-5p RSPO1 6mer 32.93

miR-133a-5p PKP1 7mer-m8 32.88

miR-133a-5p PKP1 7mer-1a 32.88

miR-133a-5p PKP1 6mer 32.88

miR-133a-5p MME 7mer-m8 32.49

miR-133a-5p PTHLH 7mer-m8 32.29

miR-133a-5p CALR 6mer 32.17

miR-133a-5p PAX5 7mer-1a 32.11

miR-133a-5p PAX5 6mer 32.11

miR-133a-5p TNFRSF10A 6mer 31.68

miR-133a-5p PLEC 6mer 31.66

miR-133a-5p DST 7mer-1a 31.59

miR-133a-5p DST 6mer 31.59

miR-133a-5p SERPINA3 6mer 31.58

miR-133a-5p NOS3 7mer-1a 31.57

miR-133a-5p KRT16 6mer 31.43

miR-133a-5p KDM4C 8mer-1a 31.27

miR-133a-5p FANCE 6mer 31.04

miR-133a-5p FADD 6mer 31.03

miR-133a-5p NCAM1 6mer 30.93

miR-133a-5p HMGA2 7mer-1a 30.87

miR-133a-5p HMGA2 6mer 30.87

miR-133a-5p IRS1 6mer 30.79

miR-133a-5p YAP1 6mer 30.69

miR-133a-5p BRD4 7mer-m8 30.56

miR-133a-5p BRD4 6mer 30.56

miR-133a-5p PIK3CD 7mer-1a 30.38

miR-133a-5p GLI2 7mer-1a 30.35

miR-133a-5p BMI1 8mer-1a 30.25

miR-133a-5p BMI1 7mer-1a 30.25

miR-133a-5p MAPK14 6mer 30.14

miR-133a-5p SQSTM1 6mer 30.05

miR-133a-5p BMP6 7mer-1a 30.03

miR-133a-5p NRG1 6mer 30

miR-133a-5p IGFBP3 7mer-1a 30

miR-133a-5p DSP 6mer 29.87

miR-133a-5p TFRC 8mer-1a 29.71

miR-133a-5p TCF7L2 6mer 29.7

miR-133a-5p LZTS1 7mer-1a 29.68

miR-133a-5p LZTS1 6mer 29.68

miR-133a-5p INSR 6mer 29.61

miR-133a-5p SOX9 7mer-1a 29.26

miR-133a-5p ING3 7mer-m8 29.22

miR-133a-5p FGF10 7mer-1a 29.2

miR-133a-5p IL2RB 7mer-1a 29.15

miR-133a-5p MSN 6mer 29.14

miR-133a-5p ABCC1 7mer-1a 29.12

miR-133a-5p ABCC1 6mer 29.12

miR-133a-5p TET2 8mer-1a 29.06

miR-133a-5p TET2 7mer-m8 29.06

miR-133a-5p TET2 7mer-1a 29.06

miR-133a-5p TET2 6mer 29.06

miR-133a-5p HNF4A 7mer-m8 29

miR-133a-5p HNF4A 7mer-1a 29

miR-133a-5p HNF4A 6mer 29

miR-133a-5p MSR1 7mer-1a 28.85

miR-133a-5p SMAD2 7mer-m8 28.81

miR-133a-5p SMAD2 6mer 28.81

miR-133a-5p CCND3 7mer-1a 28.55

miR-133a-5p CSF1 6mer 28.43

miR-133a-5p HLA-G 6mer 28.31

miR-133a-5p EIF4E 7mer-1a 28.23

miR-133a-5p EIF4E 6mer 28.23

miR-133a-5p PRKCA 7mer-1a 28.14

miR-133a-5p PRKCA 6mer 28.14

miR-133a-5p SOD2 7mer-m8 27.98

miR-133a-5p SOD2 6mer 27.98

miR-133a-5p DHFR 6mer 27.92

miR-133a-5p ICOSLG 6mer 27.88

miR-133a-5p LRRC56 6mer 27.72

miR-133a-5p SP1 6mer 27.56

miR-133a-5p FERMT1 7mer-m8 27.53

miR-133a-5p LAMA4 7mer-1a 27.4

miR-133a-5p LAMA4 6mer 27.4

miR-133a-5p CASP10 6mer 27.37

miR-133a-5p DNMT3A6mer 27.24

miR-133a-5p LTA 6mer 26.92

miR-133a-5p PTCH2 7mer-1a 26.91

miR-133a-5p PTCH2 6mer 26.91

miR-133a-5p MTHFR 7mer-1a 26.88

miR-133a-5p MTHFR 6mer 26.88

miR-133a-5p RNASEL 6mer 26.79

miR-133a-5p SLX4 8mer-1a 26.62

miR-133a-5p SLX4 6mer 26.62

miR-133a-5p ALDH2 6mer 26.4

miR-133a-5p CCR7 6mer 26.35

miR-133a-5p PML 6mer 26.26

miR-133a-5p FOXP1 8mer-1a 26.26

miR-133a-5p FOXP1 6mer 26.26

miR-133a-5p CD28 6mer 26.23

miR-133a-5p RHOH 6mer 26.22

miR-133a-5p AMACR 6mer 26.17

miR-133a-5p COL1A1 6mer 26.15

miR-133a-5p FOXE1 7mer-1a 26

miR-133a-5p COMT 7mer-1a 25.73

miR-133a-5p COMT 6mer 25.73

miR-133a-5p EPAS1 6mer 25.49

miR-133a-5p ADAR 6mer 25.31

miR-133a-5p IKBKG 6mer 25.29

miR-133a-5p FOXN1 7mer-1a 25.23

miR-133a-5p GDNF 7mer-1a 25.2

miR-133a-5p GDNF 6mer 25.2

miR-133a-5p CD59 8mer-1a 25.18

miR-133a-5p CD59 6mer 25.18

miR-133a-5p HDAC9 7mer-1a 25.13

miR-133a-5p SIRT1 7mer-1a 25.02

miR-133a-5p TTN 6mer 24.95

miR-133a-5p IL6R 7mer-m8 24.84

miR-133a-5p IL6R 7mer-1a 24.84

miR-133a-5p IL6R 6mer 24.84

miR-133a-5p SOS2 7mer-1a 24.76

miR-133a-5p GLI3 6mer 24.76

miR-133a-5p DCC 6mer 24.62

miR-133a-5p RAP1A 6mer 24.45

miR-133a-5p CCL5 6mer 24.45

miR-133a-5p GJA1 7mer-1a 24.4

miR-133a-5p FOXO1 6mer 24.4

miR-133a-5p ITGB3 8mer-1a 24.28

miR-133a-5p GRB2 7mer-1a 24.21

miR-133a-5p IFNB1 7mer-1a 24.12

miR-133a-5p HLA-DPB1 6mer 24.07

miR-133a-5p LGALS1 6mer 24.01

miR-133a-5p STK4 7mer-m8 24

miR-133a-5p SLC45A2 6mer 23.98

miR-133a-5p BCL2L11 7mer-1a 23.97

miR-133a-5p CTSB 7mer-1a 23.93

miR-133a-5p CTSB 6mer 23.93

miR-133a-5p SERPINB5 6mer 23.92

miR-133a-5p EZR 6mer 23.9

miR-133a-5p CYLD 7mer-1a 23.9

miR-133a-5p CYLD 6mer 23.9

miR-133a-5p PSEN1 7mer-1a 23.89

miR-133a-5p PSEN1 6mer 23.89

miR-133a-5p NOTCH2 8mer-1a 23.83

miR-133a-5p CHD7 6mer 23.64

miR-133a-5p NSD1 6mer 23.6

miR-133a-5p CFLAR 7mer-m8 23.56

miR-133a-5p CFLAR 7mer-1a 23.56

miR-133a-5p CFLAR 6mer 23.56

miR-133a-5p TNFRSF1A 7mer-1a 23.47

miR-133a-5p HOPX 7mer-m8 23.25

miR-133a-5p HOPX 6mer 23.25

miR-133a-5p WNT3 7mer-1a 23.23

miR-133a-5p WNT3 6mer 23.23

miR-133a-5p HAVCR2 7mer-m8 23.16

miR-133a-5p SDHC 6mer 23.15

miR-133a-5p BRIP1 6mer 23.1

miR-133a-5p THBS1 6mer 22.98

miR-133a-5p DRD2 7mer-m8 22.96

miR-133a-5p RPS6KB1 6mer 22.81

miR-133a-5p INHBA 7mer-m8 22.79

miR-133a-5p ALDOA 6mer 22.62

miR-133a-5p MYD88 7mer-1a 22.56

miR-133a-5p MYD88 6mer 22.56

miR-133a-5p ANGPT2 7mer-1a 22.29

miR-133a-5p ANGPT2 6mer 22.29

miR-133a-5p ITGAM 6mer 22.17

miR-133a-5p G6PD 7mer-1a 22.17

miR-133a-5p VTN 6mer 22.11

miR-133a-5p SERPINE1 7mer-m8 22.04

miR-133a-5p SERPINE1 6mer 22.04

miR-133a-5p GTF2H5 6mer 22.02

miR-133a-5p ADH1B 6mer 21.74

miR-133a-5p S100A2 7mer-1a 21.68

miR-133a-5p CDX2 6mer 21.46

miR-133a-5p CADM1 8mer-1a 21.45

miR-133a-5p CADM1 7mer-1a 21.45

miR-133a-5p RAD51C 6mer 21.44

miR-133a-5p TRIM24 7mer-m8 21.41

miR-133a-5p TRIM24 7mer-1a 21.41

miR-133a-5p TRIM24 6mer 21.41

miR-133a-5p EDN1 6mer 21.35

miR-133a-5p TGIF1 6mer 21.32

miR-133a-5p LEF1 7mer-1a 21.25

miR-133a-5p ANXA2 6mer 21.2

miR-133a-5p TFEB 6mer 21.19

miR-133a-5p KLRK1 6mer 21.14

miR-133a-5p RRM2B 8mer-1a 21.12

miR-133a-5p RRM2B 7mer-m8 21.12

miR-133a-5p TBL1XR1 6mer 21.1

miR-133a-5p S100A1 6mer 21.07

miR-133a-5p NR3C1 8mer-1a 21.05

miR-133a-5p NR3C1 6mer 21.05

miR-133a-5p GBA 7mer-1a 21.03

miR-133a-5p GBA 6mer 21.03

miR-133a-5p PIK3R2 6mer 20.91

miR-133a-5p ITGA3 7mer-m8 20.89

miR-133a-5p ITGA3 7mer-1a 20.89

miR-133a-5p ITGA3 6mer 20.89

miR-133a-5p NTRK2 6mer 20.84

miR-133a-5p PSMB9 7mer-1a 20.79

miR-133a-5p PSMB9 6mer 20.79

miR-133a-5p IL18 6mer 20.78

miR-133a-5p FOSL1 7mer-1a 20.76

miR-133a-5p FOSL1 6mer 20.76

miR-133a-5p BMPR2 7mer-1a 20.67

miR-133a-5p BMPR2 6mer 20.67

miR-133a-5p AIRE 6mer 20.61

miR-133a-5p TNFAIP3 6mer 20.51

miR-133a-5p RAB27A 8mer-1a 20.49

miR-133a-5p PLAG1 7mer-1a 20.45

miR-133a-5p MBTPS2 8mer-1a 20.41

miR-133a-5p MBTPS2 7mer-1a 20.41

miR-133a-5p MBTPS2 6mer 20.41

miR-133a-5p THY1 7mer-m8 20.39

miR-133a-5p CYP3A5 7mer-1a 20.37

miR-133a-5p CYP3A5 6mer 20.37

miR-133a-5p RUNX2 6mer 20.36

miR-133a-5p CCNE1 6mer 20.34

miR-133a-5p ITGAL 7mer-1a 20.33

miR-133a-5p ITGAL 6mer 20.33

miR-133a-5p RUNX3 7mer-m8 20.28

miR-133a-5p RUNX3 6mer 20.28

miR-133a-5p SLC52A36mer 20.27

miR-133a-5p TCF4 7mer-1a 20.19

miR-133a-5p TCF4 6mer 20.19

miR-133a-5p KRT15 7mer-1a 20.16

miR-133a-5p KRT15 6mer 20.16

miR-133a-5p SKP2 7mer-1a 20.12

miR-133a-5p RXRA 6mer 20

miR-133a-5p POLE 6mer 19.89

miR-133a-5p EGLN1 6mer 19.89

miR-133a-5p DSC3 7mer-m8 19.82

miR-133a-5p CASP7 7mer-1a 19.72

miR-133a-5p REN 6mer 19.65

miR-133a-5p CD55 7mer-m8 19.63

miR-133a-5p SERPINA1 7mer-m8 19.58

miR-133a-5p CD68 6mer 19.55

miR-133a-5p TRAF6 7mer-m8 19.52

miR-133a-5p TRAF6 7mer-1a 19.52

miR-133a-5p TRAF6 6mer 19.52

miR-133a-5p NES 6mer 19.45

miR-133a-5p TCF3 7mer-1a 19.29

miR-133a-5p TCF3 6mer 19.29

miR-133a-5p E2F2 7mer-1a 19.18

miR-133a-5p CARD11 7mer-1a 19.15

miR-133a-5p FOXO3 6mer 19.12

miR-133a-5p FANCM 6mer 19

miR-133a-5p VEGFB 7mer-m8 18.99

miR-133a-5p TSHR 8mer-1a 18.97

miR-133a-5p TSHR 7mer-1a 18.97

miR-133a-5p SLC7A5 7mer-1a 18.71

miR-133a-5p SLC7A5 6mer 18.71

miR-133a-5p RUNX1 8mer-1a 18.69

miR-133a-5p RUNX1 7mer-1a 18.69

miR-133a-5p RUNX1 6mer 18.69

miR-133a-5p APP 6mer 18.67

miR-133a-5p ATP2A2 6mer 18.56

miR-133a-5p DSC2 6mer 18.53

miR-133a-5p HFE 8mer-1a 18.48

miR-133a-5p HFE 7mer-m8 18.48

miR-133a-5p PDPK1 7mer-1a 18.4

miR-133a-5p TTR 6mer 18.24

miR-133a-5p MTDH 6mer 18.24

miR-133a-5p NRP1 7mer-1a 18.23

miR-133a-5p NRP1 6mer 18.23

miR-133a-5p MAP2K7 6mer 18.17

miR-133a-5p FURIN 6mer 18.05

miR-133a-5p DSG2 6mer 18.02

miR-133a-5p TRIP13 7mer-m8 17.94

miR-133a-5p GATA6 7mer-1a 17.9

miR-133a-5p GATA6 6mer 17.9

miR-133a-5p PDCD4 6mer 17.87

miR-133a-5p DDX3X 8mer-1a 17.79

miR-133a-5p DDX3X 7mer-m8 17.79

miR-133a-5p DDX3X 6mer 17.79

miR-133a-5p DDR1 6mer 17.79

miR-133a-5p GREM1 7mer-m8 17.76

miR-133a-5p GREM1 7mer-1a 17.76

miR-133a-5p IFIH1 8mer-1a 17.72

miR-133a-5p IFIH1 6mer 17.72

miR-133a-5p EIF4EBP1 7mer-1a 17.72

miR-133a-5p EIF4EBP1 6mer 17.72

miR-133a-5p MAPK9 6mer 17.7

miR-133a-5p MVD 7mer-1a 17.69

miR-133a-5p MVD 6mer 17.69

miR-133a-5p GSTM3 6mer 17.68

miR-133a-5p MTAP 6mer 17.63

miR-133a-5p MICA 6mer 17.59

miR-133a-5p PRKCB 7mer-1a 17.36

miR-133a-5p PRKCB 6mer 17.36

miR-133a-5p POLH 7mer-m8 17.36

miR-133a-5p POLH 6mer 17.36

miR-133a-5p WNT1 7mer-1a 17.32

miR-133a-5p NFIB 7mer-1a 17.32

miR-133a-5p NFIB 6mer 17.32

miR-133a-5p NCOR1 7mer-1a 17.28

miR-133a-5p CEACAM1 6mer 17.28

miR-133a-5p WNT4 7mer-1a 17.25

miR-133a-5p THPO 7mer-m8 17.25

miR-133a-5p AHCY 7mer-1a 17.25

miR-133a-5p REST 7mer-1a 17.23

miR-133a-5p REST 6mer 17.23

miR-133a-5p AHI1 6mer 17.22

miR-133a-5p MPLKIP 8mer-1a 17.19

miR-133a-5p MPLKIP 7mer-m8 17.19

miR-133a-5p MPLKIP 6mer 17.19

miR-133a-5p GPR68 6mer 17.14

miR-133a-5p SELP 6mer 17.13

miR-133a-5p PBX1 7mer-1a 17.12

miR-133a-5p AP3B1 6mer 17.09

miR-133a-5p BMP7 7mer-m8 17.08

miR-133a-5p BMP7 7mer-1a 17.08

miR-133a-5p BMP7 6mer 17.08

miR-133a-5p WNT10B 6mer 17.03

miR-133a-5p IGFBP2 7mer-1a 17.02

miR-133a-5p EPHA4 6mer 16.95

miR-133a-5p THBD 6mer 16.89

miR-133a-5p ANKRD11 7mer-m8 16.74

miR-133a-5p ITGA5 6mer 16.7

miR-133a-5p CDH13 6mer 16.7

miR-133a-5p TNFRSF1B 6mer 16.66

miR-133a-5p AGO2 6mer 16.6

miR-133a-5p STMN1 7mer-m8 16.59

miR-133a-5p STMN1 7mer-1a 16.59

miR-133a-5p STMN1 6mer 16.59

miR-133a-5p SIX1 7mer-1a 16.57

miR-133a-5p SIX1 6mer 16.57

miR-133a-5p SLC17A5 7mer-m8 16.52

miR-133a-5p SLC17A5 6mer 16.52

miR-133a-5p TOP3A 7mer-1a 16.49

miR-133a-5p TOP3A 6mer 16.49

miR-133a-5p EIF2AK2 7mer-1a 16.45

miR-133a-5p EIF2AK2 6mer 16.45

miR-133a-5p SOX4 6mer 16.41

miR-133a-5p TRPV3 6mer 16.4

miR-133a-5p HPSE 7mer-m8 16.29

miR-133a-5p E2F3 7mer-1a 16.29

miR-133a-5p USB1 8mer-1a 16.28

miR-133a-5p USB1 7mer-m8 16.28

miR-133a-5p PEG10 7mer-1a 16.22

miR-133a-5p PEG10 6mer 16.22

miR-133a-5p EVC 6mer 16.21

miR-133a-5p ERCC8 8mer-1a 16.18

miR-133a-5p ERCC8 6mer 16.18

miR-133a-5p HABP2 7mer-1a 16.06

miR-133a-5p LYVE1 6mer 16.05

miR-133a-5p SSTR2 6mer 16.02

miR-133a-5p CEACAM6 7mer-m8 15.94

miR-133a-5p F7 7mer-1a 15.92

miR-133a-5p WNT3A 6mer 15.84

miR-133a-5p ABCB11 6mer 15.82

miR-133a-5p UGT1A1 6mer 15.79

miR-133a-5p G6PC3 6mer 15.79

miR-133a-5p CD3D 6mer 15.78

miR-133a-5p TRAF2 6mer 15.71

miR-133a-5p NTS 7mer-m8 15.71

miR-133a-5p MYH9 7mer-1a 15.71

miR-133a-5p MYH9 6mer 15.71

miR-133a-5p FOXC1 7mer-1a 15.7

miR-133a-5p FOXC1 6mer 15.7

miR-133a-5p CR1 6mer 15.69

miR-133a-5p LTF 7mer-1a 15.67

miR-133a-5p IL1R1 7mer-1a 15.61

miR-133a-5p IL1R1 6mer 15.61

miR-133a-5p TNC 6mer 15.6

miR-133a-5p PMVK 7mer-1a 15.56

miR-133a-5p NCOA3 6mer 15.56

miR-133a-5p LIN28B 7mer-m8 15.45

miR-133a-5p BAG1 6mer 15.45

miR-133a-5p TIA1 6mer 15.4

miR-133a-5p MAU2 6mer 15.16

miR-133a-5p EXO1 6mer 15.16

miR-133a-5p BIRC7 6mer 15.14

miR-133a-5p CSF3R 7mer-1a 15.11

miR-133a-5p ST14 7mer-m8 15.09

miR-133a-5p ST14 6mer 15.09

miR-133a-5p MICB 7mer-1a 15.08

miR-133a-5p MICB 6mer 15.08

miR-133a-5p PTGER4 6mer 15.07

miR-133a-5p ELAVL1 8mer-1a 15.02

miR-133a-5p ATXN2 6mer 15.01

miR-133a-5p ATF1 6mer 15.01

miR-133a-5p GNA11 7mer-1a 14.98

miR-133a-5p FUS 6mer 14.93

miR-133a-5p SFTPB 6mer 14.85

miR-133a-5p PVR 8mer-1a 14.85

miR-133a-5p PVR 7mer-1a 14.85

miR-133a-5p PVR 6mer 14.85

miR-133a-5p CYP11A1 6mer 14.84

miR-133a-5p FANCB 6mer 14.83

miR-133a-5p PPARGC1A 7mer-1a 14.82

miR-133a-5p MUC6 7mer-1a 14.8

miR-133a-5p MUC6 6mer 14.8

miR-133a-5p CD1A 7mer-1a 14.72

miR-133a-5p ERG 6mer 14.63

miR-133a-5p PEX2 6mer 14.62

miR-133a-5p SIRT3 6mer 14.61

miR-133a-5p TJP1 7mer-m8 14.56

miR-133a-5p TJP1 7mer-1a 14.56

miR-133a-5p PRKCI 6mer 14.54

miR-133a-5p DCLRE1C 6mer 14.53

miR-133a-5p LDLR 6mer 14.51

miR-133a-5p CD38 6mer 14.51

miR-133a-5p KNSTRN 6mer 14.49

miR-133a-5p NNMT 7mer-1a 14.46

miR-133a-5p ALCAM 6mer 14.45

miR-133a-5p LDHA 6mer 14.43

miR-133a-5p HSP90B1 7mer-m8 14.38

miR-133a-5p FTO 7mer-1a 14.38

miR-133a-5p FTO 6mer 14.38

miR-133a-5p TMPRSS6 6mer 14.36

miR-133a-5p IL12B 7mer-m8 14.25

miR-133a-5p IL12B 6mer 14.25

miR-133a-5p DVL3 7mer-1a 14.2

miR-133a-5p DVL3 6mer 14.2

miR-133a-5p BCL11A 7mer-1a 14.19

miR-133a-5p BCL11A 6mer 14.19

miR-133a-5p USP7 6mer 14.14

miR-133a-5p DBH 6mer 14.07

miR-133a-5p NEUROD1 7mer-1a 14.06

miR-133a-5p RPA1 7mer-1a 14

miR-133a-5p RPA1 6mer 14

miR-133a-5p G6PC 6mer 14

miR-133a-5p DSE 7mer-m8 13.9

miR-133a-5p APOA1 6mer 13.88

miR-133a-5p CYP1A2 6mer 13.77

miR-133a-5p PAX7 7mer-m8 13.75

miR-133a-5p PAX7 6mer 13.75

miR-133a-5p MS4A1 7mer-1a 13.72

miR-133a-5p CST3 6mer 13.67

miR-133a-5p AGT 6mer 13.6

miR-133a-5p DPM1 6mer 13.59

miR-133a-5p LYST 8mer-1a 13.57

miR-133a-5p LYST 7mer-1a 13.57

miR-133a-5p GLA 6mer 13.52

miR-133a-5p LPP 8mer-1a 13.51

miR-133a-5p LPP 7mer-1a 13.51

miR-133a-5p LPP 6mer 13.51

miR-133a-5p DACT1 6mer 13.51

miR-133a-5p DDX59 7mer-1a 13.5

miR-133a-5p DDX59 6mer 13.5

miR-133a-5p UBB 6mer 13.48

miR-133a-5p MECP2 7mer-m8 13.48

miR-133a-5p MECP2 6mer 13.48

miR-133a-5p PIK3C2A 6mer 13.42

miR-133a-5p APOLD1 7mer-1a 13.41

miR-133a-5p CNR1 6mer 13.4

miR-133a-5p HDAC6 6mer 13.38

miR-133a-5p RASSF5 6mer 13.33

miR-133a-5p GSDMB 6mer 13.33

miR-133a-5p WNT7A 6mer 13.31

miR-133a-5p ALX4 6mer 13.3

miR-133a-5p ADAM12 6mer 13.28

miR-133a-5p CSNK2A1 7mer-1a 13.22

miR-133a-5p CSNK2A1 6mer 13.22

miR-133a-5p RPS14 7mer-1a 13.21

miR-133a-5p RPS14 6mer 13.21

miR-133a-5p TRAF1 6mer 13.2

miR-133a-5p OPRM1 8mer-1a 13.19

miR-133a-5p OPRM1 7mer-m8 13.19

miR-133a-5p OPRM1 7mer-1a 13.19

miR-133a-5p OPRM1 6mer 13.19

miR-133a-5p EPHA7 7mer-m8 13.18

miR-133a-5p GPNMB 6mer 13.12

miR-133a-5p NAT9 7mer-m8 13.06

miR-133a-5p NAT9 6mer 13.06

miR-133a-5p PPP2R1A 7mer-1a 13.05

miR-133a-5p PPP2R1A 6mer 13.05

miR-133a-5p GRIN2B 8mer-1a 13.04

miR-133a-5p GRIN2B 7mer-m8 13.04

miR-133a-5p GRIN2B 7mer-1a 13.04

miR-133a-5p SH2B3 7mer-1a 13.01

miR-133a-5p SH2B3 6mer 13.01

miR-133a-5p MCM4 6mer 12.97

miR-133a-5p GPER1 6mer 12.96

miR-133a-5p EFNB3 6mer 12.95

miR-133a-5p RPL15 7mer-1a 12.92

miR-133a-5p HSPG2 6mer 12.92

miR-133a-5p BCL11B 8mer-1a 12.91

miR-133a-5p BCL11B 7mer-1a 12.91

miR-133a-5p BCL11B 6mer 12.91

miR-133a-5p LIF 6mer 12.87

miR-133a-5p TAGLN 6mer 12.86

miR-133a-5p TNFRSF10D 7mer-m8 12.82

miR-133a-5p TNFRSF10D 6mer 12.82

miR-133a-5p ARNT 7mer-m8 12.74

miR-133a-5p ATP7B 7mer-1a 12.73

miR-133a-5p ATP7B 6mer 12.73

miR-133a-5p TGM2 6mer 12.71

miR-133a-5p KCNN4 6mer 12.71

miR-133a-5p PPARA 7mer-m8 12.67

miR-133a-5p PPARA 7mer-1a 12.67

miR-133a-5p PPARA 6mer 12.67

miR-133a-5p LYN 6mer 12.66

miR-133a-5p CDC25A 7mer-m8 12.61

miR-133a-5p CDC25A 6mer 12.61

miR-133a-5p IGBP1 7mer-1a 12.56

miR-133a-5p GRHL2 7mer-1a 12.55

miR-133a-5p GRHL2 6mer 12.55

miR-133a-5p FECH 6mer 12.53

miR-133a-5p KCNH1 6mer 12.52

miR-133a-5p WNT2B 7mer-m8 12.46

miR-133a-5p WNT2B 6mer 12.46

miR-133a-5p RHOC 7mer-1a 12.46

miR-133a-5p ARL2BP 6mer 12.43

miR-133a-5p SMAD7 6mer 12.41

miR-133a-5p EDAR 6mer 12.4

miR-133a-5p CEACAM3 6mer 12.37

miR-133a-5p TNFRSF9 6mer 12.36

miR-133a-5p KLK7 7mer-1a 12.36

miR-133a-5p ADAM17 6mer 12.36

miR-133a-5p PRDX1 6mer 12.34

miR-133a-5p MBP 6mer 12.31

miR-133a-5p CHRNA3 7mer-m8 12.3

miR-133a-5p CHRNA3 7mer-1a 12.3

miR-133a-5p RRM1 7mer-1a 12.29

miR-133a-5p PTPRN 6mer 12.28

miR-133a-5p IMPG1 7mer-m8 12.28

miR-133a-5p IMPG1 6mer 12.28

miR-133a-5p DLG1 6mer 12.28

miR-133a-5p CYP2C19 7mer-m8 12.26

miR-133a-5p CCBE1 7mer-m8 12.26

miR-133a-5p CCBE1 6mer 12.26

miR-133a-5p MYCL 7mer-1a 12.25

miR-133a-5p MYCL 6mer 12.25

miR-133a-5p CCR4 6mer 12.23

miR-133a-5p SRD5A1 7mer-1a 12.21

miR-133a-5p SRD5A1 6mer 12.21

miR-133a-5p KIR3DL1 8mer-1a 12.14

miR-133a-5p KIR3DL1 7mer-1a 12.14

miR-133a-5p RHOB 6mer 12.1

miR-133a-5p ZBTB16 7mer-m8 12.06

miR-133a-5p ZBTB16 6mer 12.06

miR-133a-5p ITK 7mer-1a 12.04

miR-133a-5p ITK 6mer 12.04

miR-133a-5p ACTN4 6mer 12.04

miR-133a-5p LCN2 6mer 12.03

miR-133a-5p FTL 6mer 12

miR-133a-5p ROBO1 7mer-1a 11.99

miR-133a-5p TERF2 7mer-1a 11.98

miR-133a-5p TERF2 6mer 11.98

miR-133a-5p RPS6KA3 6mer 11.98

miR-133a-5p PPM1D 6mer 11.97

miR-133a-5p CHRNA5 6mer 11.96

miR-133a-5p LIMK1 7mer-1a 11.93

miR-133a-5p PNP 6mer 11.92

miR-133a-5p IRF6 6mer 11.92

miR-133a-5p HSD17B1 7mer-m8 11.91

miR-133a-5p HSD17B1 6mer 11.91

miR-133a-5p CDC25B 7mer-m8 11.91

miR-133a-5p CDC25B 7mer-1a 11.91

miR-133a-5p MLH3 8mer-1a 11.88

miR-133a-5p MLH3 6mer 11.88

miR-133a-5p GP6 6mer 11.86

miR-133a-5p XRCC2 8mer-1a 11.85

miR-133a-5p XRCC2 6mer 11.85

miR-133a-5p AICDA 6mer 11.84

miR-133a-5p GSR 7mer-m8 11.77

miR-133a-5p GSR 6mer 11.77

miR-133a-5p ROCK2 7mer-m8 11.76

miR-133a-5p ROCK2 7mer-1a 11.76

miR-133a-5p ROCK2 6mer 11.76

miR-133a-5p TPD52 6mer 11.75

miR-133a-5p DDC 6mer 11.75

miR-133a-5p GLUL 7mer-1a 11.73

miR-133a-5p GLUL 6mer 11.73

miR-133a-5p SCGB1A1 6mer 11.72

miR-133a-5p NDUFAF5 6mer 11.72

miR-133a-5p DLK1 8mer-1a 11.71

miR-133a-5p DLK1 7mer-1a 11.71

miR-133a-5p DLK1 6mer 11.71

miR-133a-5p CIITA 7mer-1a 11.69

miR-133a-5p CIITA 6mer 11.69

miR-133a-5p F2RL1 6mer 11.64

miR-133a-5p CDH23 7mer-1a 11.64

miR-133a-5p CDH23 6mer 11.64

miR-133a-5p ORAI1 6mer 11.6

miR-133a-5p MB 8mer-1a 11.58

miR-133a-5p MB 7mer-1a 11.58

miR-133a-5p MB 6mer 11.58

miR-133a-5p SULF1 7mer-m8 11.5

miR-133a-5p FES 7mer-1a 11.5

miR-133a-5p TRPS1 7mer-m8 11.49

miR-133a-5p TRPS1 7mer-1a 11.49

miR-133a-5p TRPS1 6mer 11.49

miR-133a-5p FLVCR1 6mer 11.45

miR-133a-5p FERMT2 7mer-1a 11.45

miR-133a-5p ZBTB20 8mer-1a 11.44

miR-133a-5p ZBTB20 6mer 11.44

miR-133a-5p CYP27B1 6mer 11.32

miR-133a-5p RHOBTB2 7mer-m8 11.3

miR-133a-5p BID 6mer 11.3

miR-133a-5p KMT2C 6mer 11.28

miR-133a-5p PSTPIP1 8mer-1a 11.24

miR-133a-5p PSTPIP1 7mer-1a 11.24

miR-133a-5p SLC4A1 6mer 11.22

miR-133a-5p IFNAR1 7mer-1a 11.22

miR-133a-5p IFNAR1 6mer 11.22

miR-133a-5p MAP2 6mer 11.2

miR-133a-5p ASCC1 8mer-1a 11.17

miR-133a-5p ASCC1 7mer-m8 11.17

miR-133a-5p ASCC1 7mer-1a 11.17

miR-133a-5p SLCO1B3 7mer-m8 11.14

miR-133a-5p DTX1 6mer 11.13

miR-133a-5p DPYSL5 6mer 11.1

miR-133a-5p FAM168A 7mer-m8 11.08

miR-133a-5p FAM168A 7mer-1a 11.08

miR-133a-5p ZFP36 6mer 11.05

miR-133a-5p TXN 6mer 11.05

miR-133a-5p DDB1 6mer 11.04

miR-133a-5p CRABP2 6mer 11.04

miR-133a-5p DTNBP1 6mer 11.03

miR-133a-5p RECQL5 8mer-1a 10.94

miR-133a-5p RECQL5 7mer-1a 10.94

miR-133a-5p RECQL5 6mer 10.94

miR-133a-5p CASP6 6mer 10.94

miR-133a-5p WEE1 6mer 10.93

miR-133a-5p UCP2 7mer-m8 10.89

miR-133a-5p MAD2L1 6mer 10.89

miR-133a-5p IGF2BP2 6mer 10.87

miR-133a-5p FCGR2A 7mer-1a 10.86

miR-133a-5p ICOS 7mer-1a 10.82

miR-133a-5p ICOS 6mer 10.82

miR-133a-5p PRDM14 6mer 10.8

miR-133a-5p RPS20 6mer 10.77

miR-133a-5p KDM5B 7mer-m8 10.76

miR-133a-5p CTSL 7mer-m8 10.71

miR-133a-5p CTSL 6mer 10.71

miR-133a-5p NHEJ1 7mer-m8 10.7

miR-133a-5p FBXO6 7mer-m8 10.69

miR-133a-5p FCGR2B 8mer-1a 10.68

miR-133a-5p CHRNB4 6mer 10.67

miR-133a-5p AKR1C1 7mer-1a 10.65

miR-133a-5p COL4A3 8mer-1a 10.63

miR-133a-5p HLA-E 6mer 10.61

miR-133a-5p MSX2 7mer-m8 10.54

miR-133a-5p TNFRSF10C 6mer 10.47

miR-133a-5p LAMC1 8mer-1a 10.46

miR-133a-5p DUSP6 6mer 10.41

miR-133a-5p PTPN2 7mer-1a 10.39

miR-133a-5p PTPN2 6mer 10.39

miR-133a-5p BNIP3 6mer 10.39

miR-133a-5p UMPS 7mer-m8 10.35

miR-133a-5p UMPS 7mer-1a 10.35

miR-133a-5p DSG4 6mer 10.32

miR-133a-5p PODXL 6mer 10.26

miR-133a-5p CYBA 6mer 10.23

miR-133a-5p GRIN2A 7mer-1a 10.18

miR-133a-5p GRIN2A 6mer 10.18

miR-133a-5p TWIST2 7mer-1a 10.14

miR-133a-5p SPN 8mer-1a 10.14

miR-133a-5p SPN 7mer-m8 10.14

miR-133a-5p SPN 6mer 10.14

miR-133a-5p CD2AP 6mer 10.09

miR-133a-5p ELK1 6mer 10.08

miR-133a-5p IST1 6mer 10.05

miR-133a-5p MEIS1 6mer 10.04

miR-133a-5p HLA-DRB5 6mer 10.03

miR-133a-5p CDC27 7mer-1a 10.03

miR-133a-5p IRAK1 6mer 10.01
